# Supplementary material for: Couplerlib : a metadata-driven library for the integration of multiple models of higher and lower trophic level marine systems with inexact functional group matching
Source: Copernicus journal article supplement (doi:10.5194/gmd-9-947-2016), 2016-03-04
Supplement: Supplementary file 1 [file gmd-9-947-2016-supplement.zip]

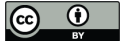

## *Supplement of*

# ***Couplerlib: a metadata-driven library for the integration of multiple models of higher and lower trophic level marine systems with inexact functional group matching***

**Jonathan Beecham et al.**

*Correspondence to:* Jonathan Beecham ([jonathan.beecham@cefas.co.uk](mailto:jonathan.beecham@cefas.co.uk))

- gmd-9-947-2016-supplement-title-page.pdf
- CouplerlibSource
  - Managed
    - \* CCouplerlib.cpp
    - \* CCouplerlib.h
  - Native
    - \* Couplerliblinux.zip
- GOTM\_ERSEM\_adapters
  - FormGotmPluggin.zip
- Namelists
  - GOTMtest.zip
- xml-Metadata
  - meecedict.zip

The copyright of individual parts of the supplement might differ from the CC-BY 3.0 licence.
